# Supplementary material for: Evaluation of human dermal fibroblasts directly reprogrammed to adipocyte-like cells as a metabolic disease model
Source: Oxford University Press journal article supplement (doi:10.1242/dmm.030981), 2017-01-01
Supplement: dmm030981supp.pdf [file dmm030981supp.pdf]

## Supplementary Tables

| Cell Line | Patient ID | Sex | Disease-related Genotype                                                                                                             | Clinical Phenotype                    | Notes                                         | Reference                                              |
|-----------|------------|-----|--------------------------------------------------------------------------------------------------------------------------------------|---------------------------------------|-----------------------------------------------|--------------------------------------------------------|
| SIR1      | P894       | M   | <i>PPARG</i> p.Leu441Leu_fs*9 heterozygote                                                                                           | Familial partial lipodystrophy type 3 |                                               | Unpublished                                            |
| SIR2      | P672       | F   | <i>INSR</i><br>p.Val93Ala/<br>del exon 18                                                                                            | Rabson Mendenhall syndrome            |                                               | P16 in Simpkin et al (Simpkin, Cochran et al. 2014)    |
| SIR3      | P0014      | F   | <i>LMNA</i><br>p.Arg482Trp heterozygote                                                                                              | Familial partial lipodystrophy type 2 | Common FPLD2 mutation                         | Kumar et al (Kumar, Durrington et al. 1996)            |
| SIR4      | P340       | M   | <i>BSCL2</i><br>c.1324delC/ p.Ala276fs*20                                                                                            | Congenital generalised lipodystrophy  | Most severe form of generalised lipodystrophy | unpublished                                            |
| SIR5      | P13        | M   | <i>ALMS1</i><br>p.Thr3591Ilefs*5/p.Thr3591Ilefs*5                                                                                    | Alström syndrome                      | Subject                                       | P13 in (Chen, Geberhiwot et al. 2017)                  |
| SIR6      | P621       | F   | <i>PIK3R1</i><br>p.Tyr657* heterozygote                                                                                              | SHORT syndrome                        |                                               | Huang-Doran et al (Huang-Doran, Tomlinson et al. 2016) |
| SIR7      |            | M   | <i>WRN</i> *                                                                                                                         | Werner syndrome                       |                                               | AG12795 (Coriell Institute)                            |
| SIR8      |            | M   | <i>BLM</i> *<br>Homozygous for a 6 p deletion/ 7bp insertion at nucleotide 2,281 of the open reading frame of the <i>RECQL3</i> gene | Bloom syndrome                        |                                               | GM02932 (Coriell Institute)                            |
| SIR9      | P384       | F   | <i>NSMCE2</i><br>p.Ser116Leufs*18/ p.Ala234Glu fs*4                                                                                  | Primordial dwarfism with extreme IR   |                                               | Patient 1 in Payne et al (Payne, Colnaghi et al. 2014) |
| SIR10     | P689       | F   | <i>PCYT1A</i><br>p.Glu280del<br>p.Ser333Leufs*164                                                                                    | Generalised lipodystrophy             |                                               | Proband 2 in Payne et al (Payne, Lim et al. 2014)      |
| SIR11     | P616       | F   | <i>PCYT1A</i><br>p.Glu280del/<br>p.Val142Met                                                                                         | Generalised lipodystrophy             |                                               | Proband 1 in Payne et al (Payne, Lim et al. 2014)      |

**Supplementary Table S1. Clinical and Genetic Diagnoses of Volunteers Contributing Dermal Fibroblasts for Study.** \*WRN and BLM deficient cells were purchased from Coriell Institute, catalogue numbers AG12795 and GM02932 respectively. Precise mutations were not available.

| Gene          | Forward primer (5' to 3' ) | Reverse primer (5' to 3' ) | Amplicon size (bp) |
|---------------|----------------------------|----------------------------|--------------------|
| <i>ADIPOQ</i> | GGGTGGGCTCCTTACAGAAC       | CTCTCTGTGCCTCTGGTTCC       | 89                 |
| <i>FABP4</i>  | TACTGGGCCAGGAATTTGAC       | TGCACATGTACCAGGACACC       | 91                 |
| <i>CEBPA</i>  | GAGGAGGGGAGAATTCTTGG       | GAGCGGTGAGTTTGCATTTTC      | 92                 |
| <i>GLUT4</i>  | AGTTCCAGCCATGAGCTACG       | CCACGATGAACCAAGGAATG       | 95                 |
| <i>LEP</i>    | CCAGGTAATGAGGGACTGGA       | CATCCCTCACCTCCTTCAAA       | 88                 |
| <i>UCP1</i>   | AGTGTGCCCAACTGTGCAAT       | AATGACGTTCCAGGATCCAA       | 105                |
| <i>CYC1</i>   | AGAGCACGACCATCGAAAAC       | TCAGGACTGACCACTTGTGC       | 104                |
| <i>ELOVL3</i> | CCTGGGTCTTTCTTCTCAGC       | GTGCTGTGGTGGTACCAGTG       | 103                |
| <i>DIO2</i>   | AGACCCAGCTCTGTTCCAAG       | TCTGCTGTTGCTGCCTAAGA       | 119                |
| <i>HPRT1</i>  | AGTTCTGTGGCCATCTGCTT       | TAGGAATGCAGCAACTGACA       | 96                 |
| <i>BSCL2</i>  | ACGTGATCGGGTGCTGATGT       | GGATGTAACTGCAAAGAG         | 538                |
| <i>PPARG</i>  | TCTCAGTGGAGACCGCCAGGTT     | GCAGTGGCTCAGGACTCTCT       | 280                |

**Supplementary Table S2. Primers used for quantitative RT-PCR and mutation confirmation**

## Supplementary Figures

C005\_Day70\_DOX+

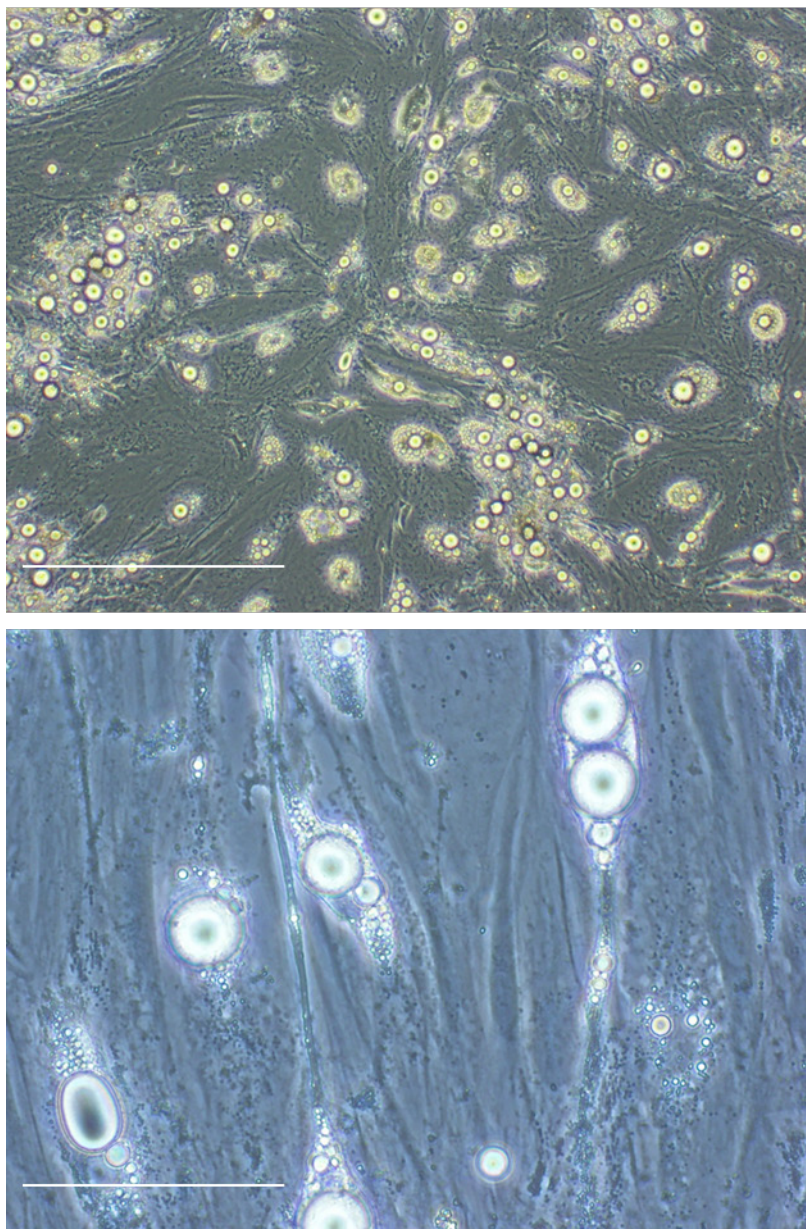

**Supplementary Figure S1. Direct reprogrammed adipocyte-like cells can be maintained in culture for a long time in the continuous presence of doxycycline.** Shown are two images at different magnifications for reprogrammed cells maintained in culture for 70 days. (scale bar: top, 200 $\mu$ m, bottom, 40 $\mu$ m).

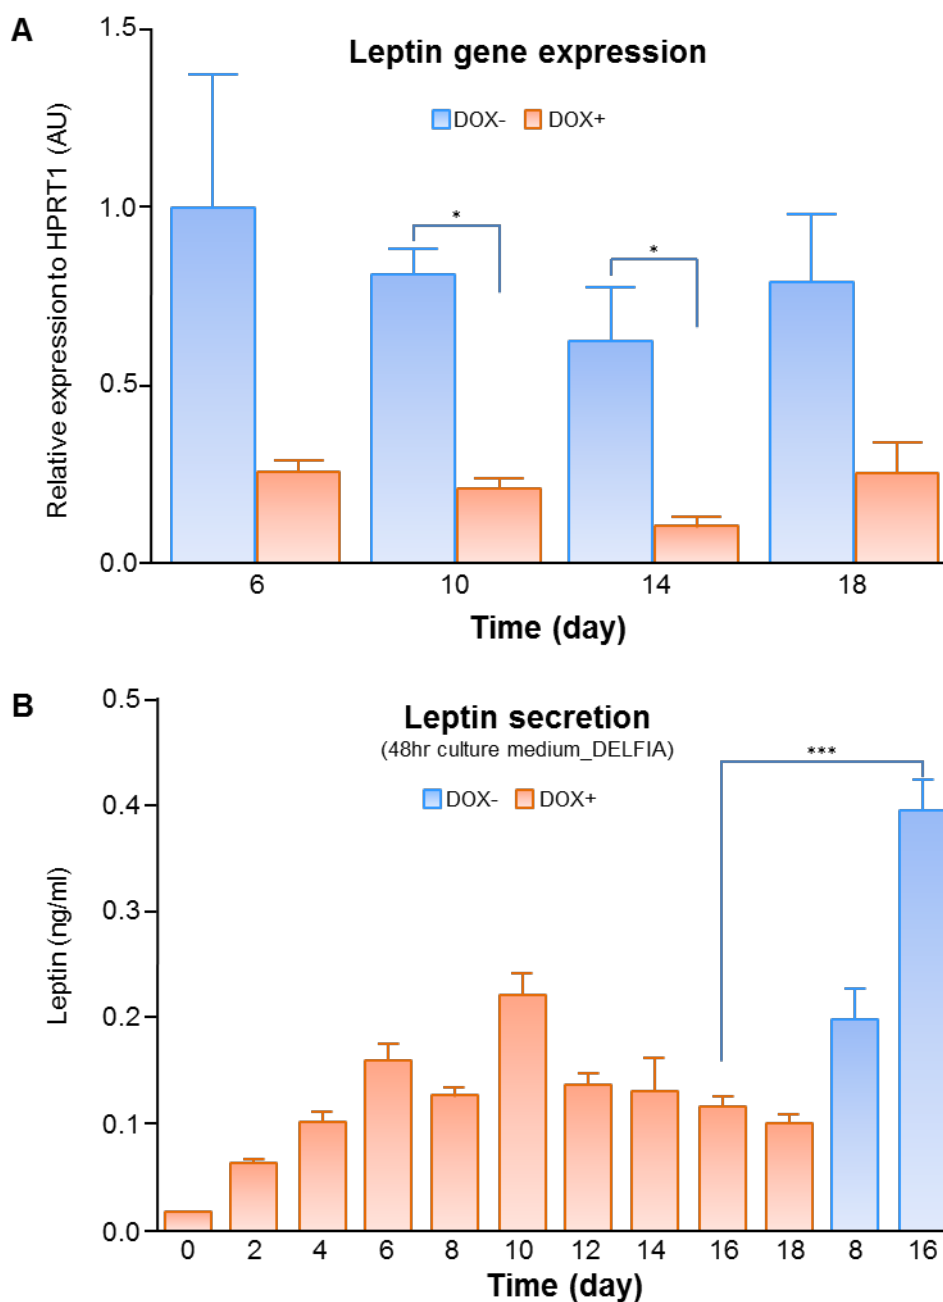

**Supplementary Figure S2. Leptin gene expression of secretion of reprogrammed adipocyte-like cells.** (A) Quantitative RT-PCR analysis of leptin gene expression. (B) Leptin secretion in 48 hour culture was determined with DELFIA. Data from three independent experiments are represented as mean  $\pm$  SEM (\* $P$ <0.05, \*\*\* $P$ <0.001,  $t$ -Test).

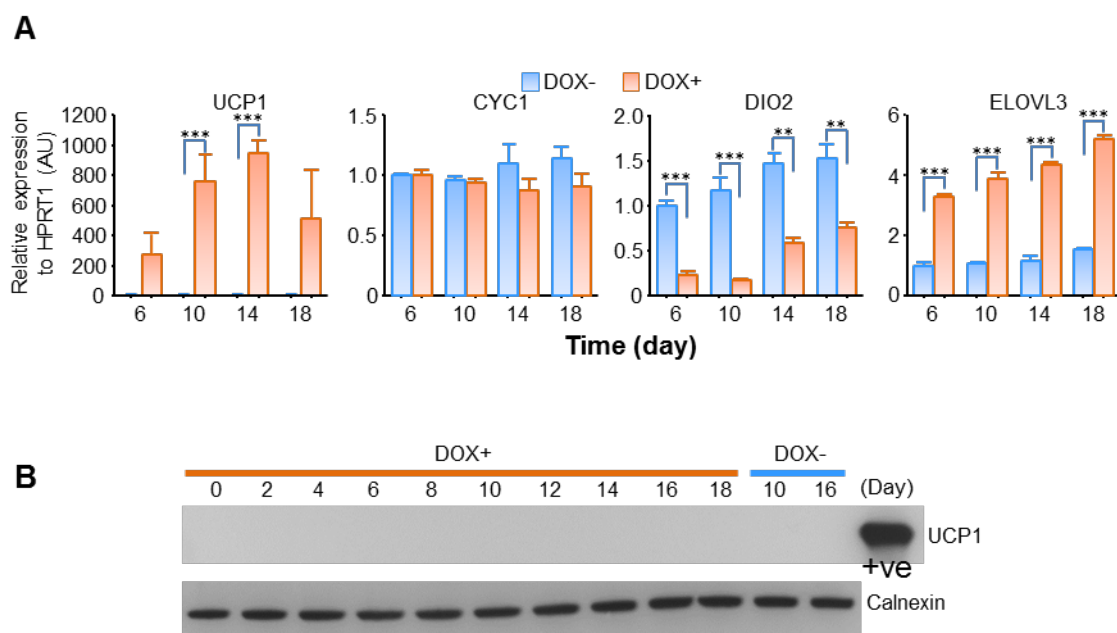

**Supplementary Figure S3. Expression of brown adipocyte-specific genes (A) and UCP1 protein (B) in reprogrammed adipocyte-like cells.** Expression was determined by quantitative RT-PCR and Western blotting respectively. A rat brown adipose sample was used as a positive control (“+ve”) in the Western blotting. Data from three independent experiments are represented as mean  $\pm$  SEM (\*\*P<0.01, \*\*\*P<0.001, t-Test).

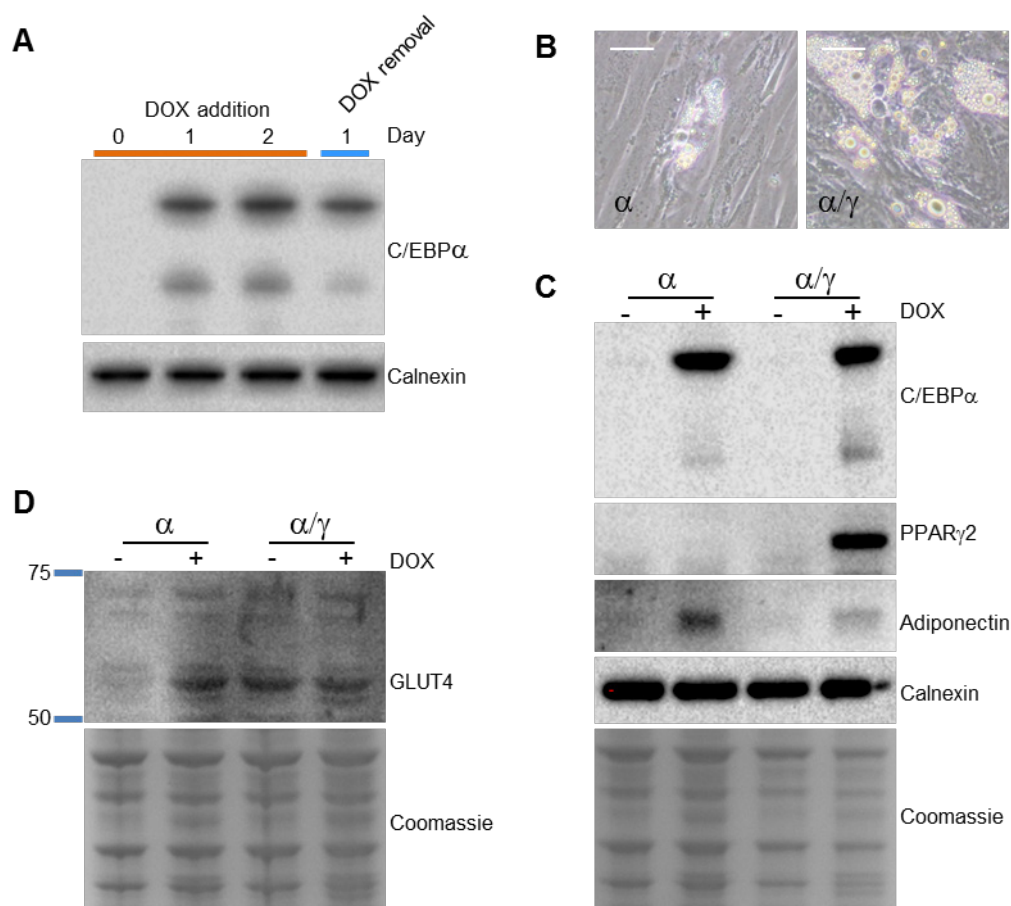

**Supplementary Figure S4. Overexpression of C/EBP $\alpha$  and adipogenic differentiation of dermal fibroblasts infected with C/EBP $\alpha$  lentivirus alone or together with PPAR $\gamma$ 2 lentivirus.**

(A) Western blot analysis of kinetics of PPAR $\gamma$ 2 overexpression in human dermal fibroblasts transduced with pSLIK-C/EBP $\alpha$  recombinant lentivirus, which were cultured in the presence of DOX (1  $\mu$ g/ml) followed by DOX withdrawal for the indicated length of time. Equal loading was revealed by calnexin antibody. (B) Representative images of adipocyte-like cells that accumulated lipid droplets upon DOX induction of C/EBP $\alpha$  overexpression ( $\alpha$ ) or co-overexpression of C/EBP $\alpha$  and PPAR $\gamma$ 2 ( $\alpha/\gamma$ ) at adipogenic differentiation day 9. (scale bar: 10 $\mu$ m).

(C) Western blot analysis of C/EBP $\alpha$ , PPAR $\gamma$ 2, and adiponectin in cells that had been subjected for adipogenic differentiation in the presence or absence of DOX for 9 days. Loading was revealed by calnexin antibody as well as Coomassie staining. (D) Western blot analysis of GLUT4 expression in cells as in (C) above using unboiled samples. Equal loading was revealed by Coomassie staining. Note the uneven exposure of the blot that resulted in lighter bands coinciding with the first lane on the left hand side.

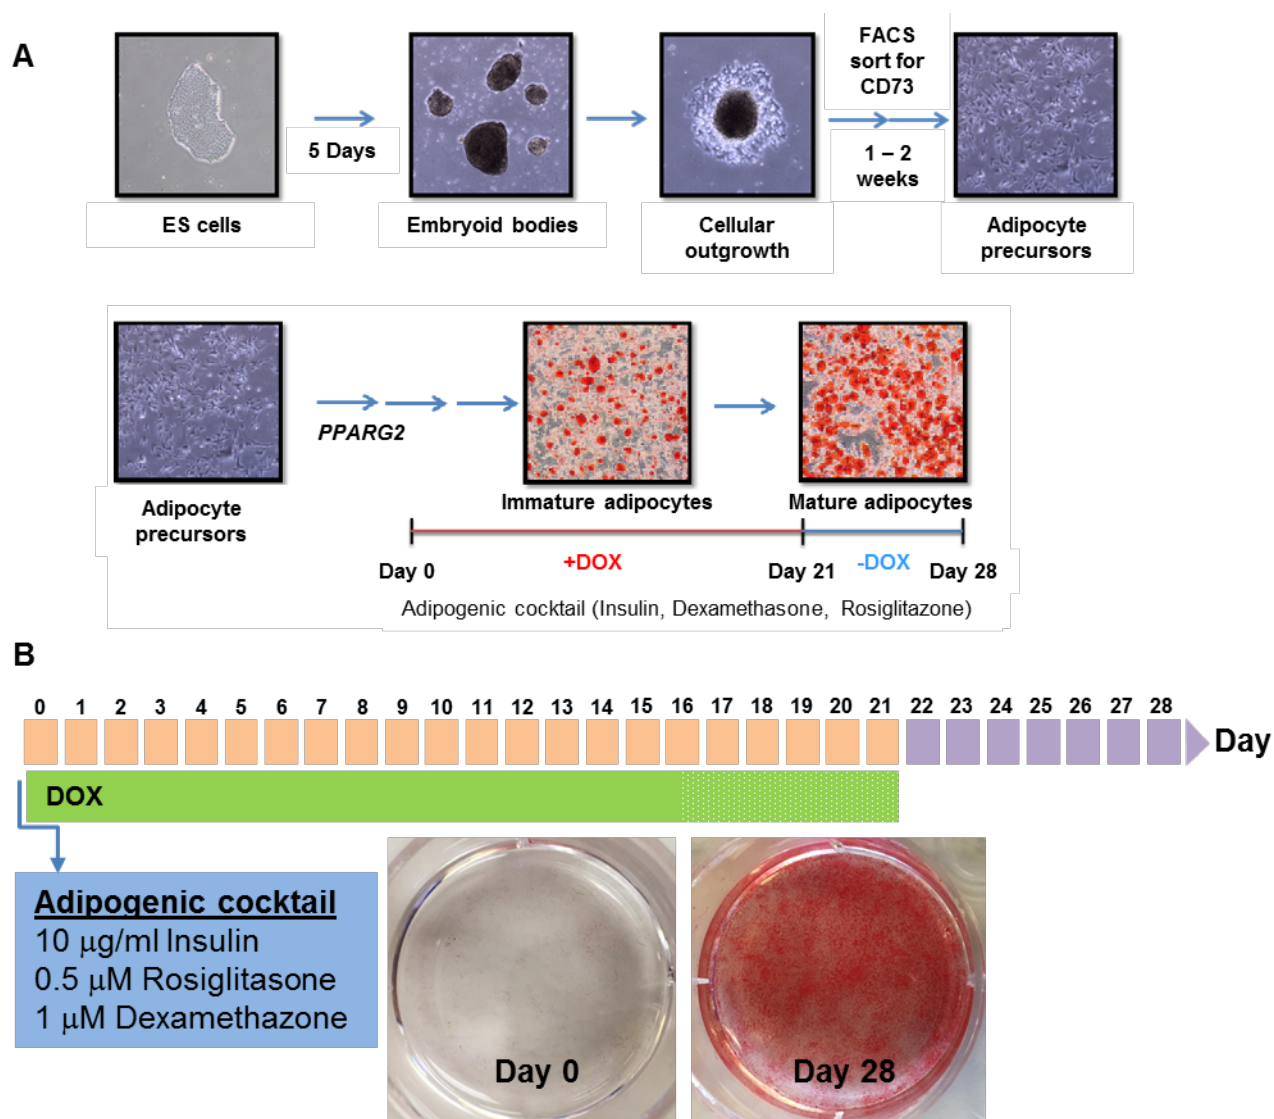

**Supplementary Figure S5. Protocol of adipogenic differentiation via pluripotent stem cell stage.** Overview of the protocol for deriving adipocytes from pluripotent stem cells. (A) Pluripotent stem cells were first differentiated into embryoid bodies (EBs) from which adipocyte precursor (AP) cells were derived. (B) Schematic showing adipogenic differentiation protocol which consists of DOX induction in the presence of adipogenic cocktail for the indicated time. DOX was included in the medium until day 16 or day 21 and cells were used for analysis either on the same day when DOX was withdrawn or 7 days after DOX withdrawal. Oil Red O staining showing a successful conversion of adipocyte precursors (Day 0) into triglyceride-laden adipocyte-like cells (Day 28).

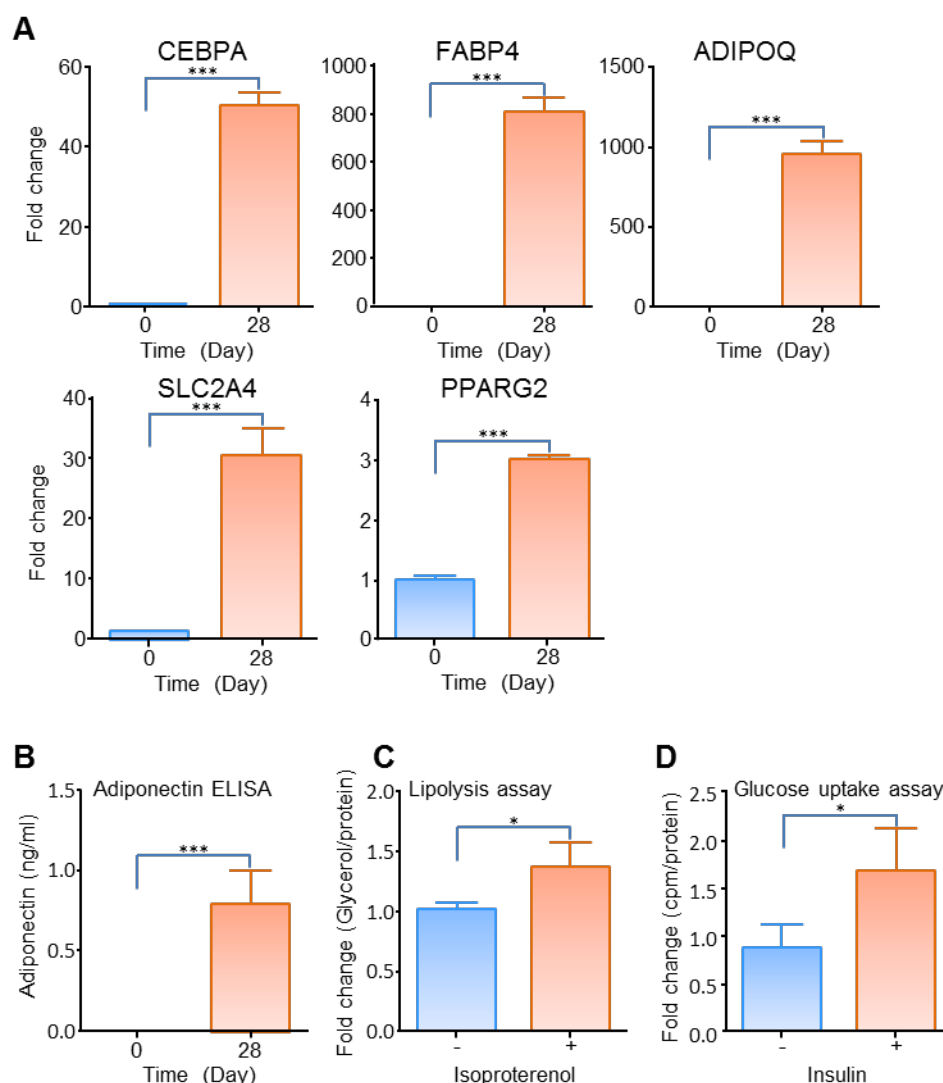

**Supplementary Figure S6. Characterisation of adipocyte-like cells obtained using a protocol described in Supplementary figure 6.** For details of quantitative RT-PCR (A), ELISA, lipolysis assay and glucose uptake assay (B), see above respective figure legends. Data from three independent experiments are represented as mean  $\pm$  SEM (\* $P$ <0.05, \*\*\* $P$ <0.001,  $t$ -Test).



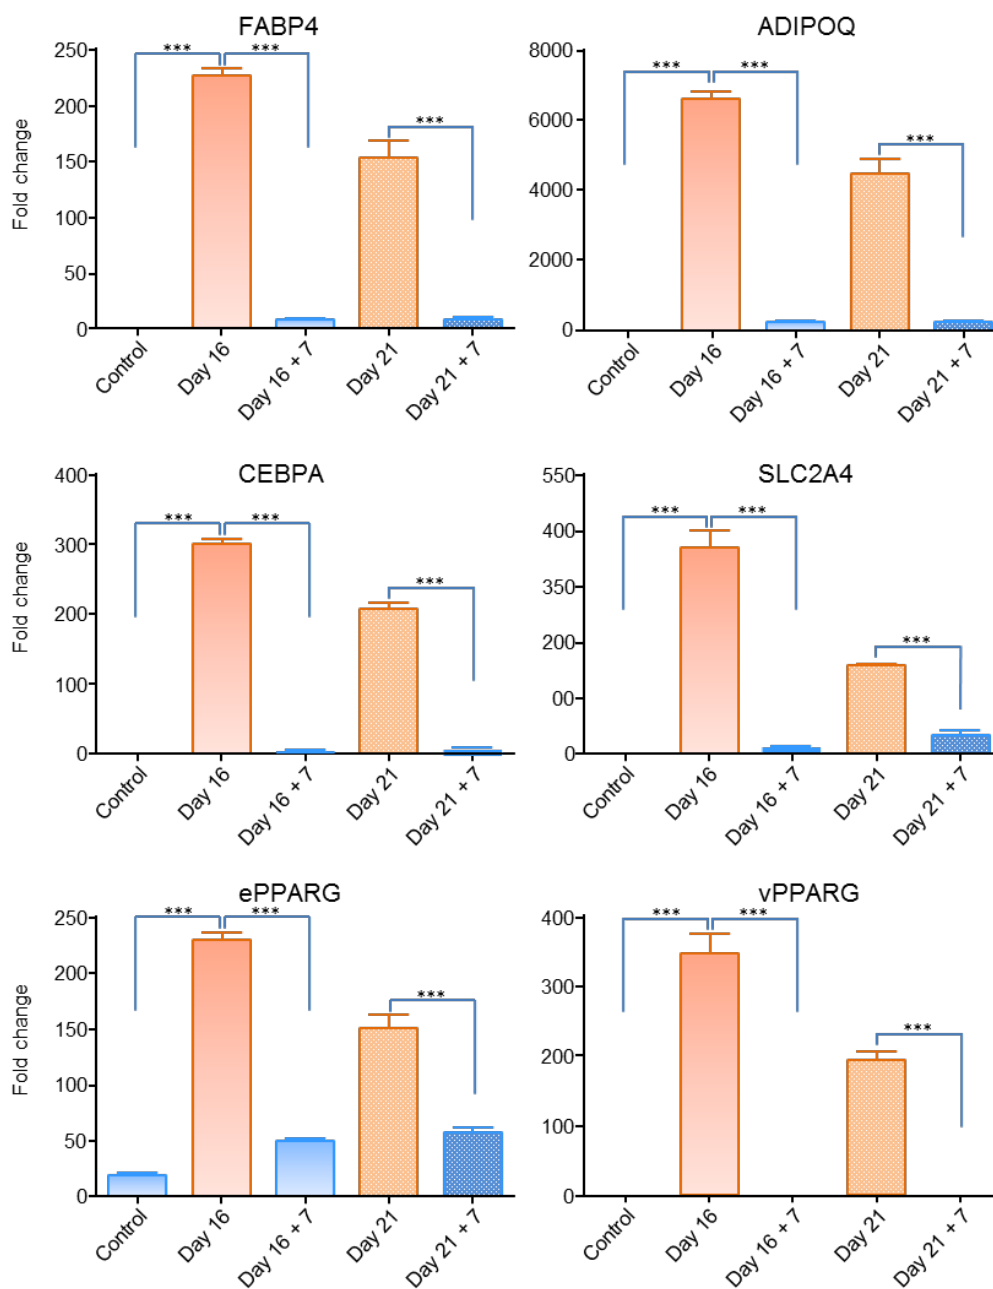

**Supplementary Figure S7. Marked decrease in expression of adipocyte specific genes in mature differentiated adipocyte-like cells 7 days after withdraw of PPAR $\gamma$ 2 overexpression inducing reagent DOX.** Endogenous PPAR $\gamma$  (ePPARG) expression was determined by RT-PCR using a pair of primers specific to a 3'-UTR region immediately after PPARg stop codon while pSLIK-PPAR $\gamma$ 2 expression was determined by RT-PCR using a forward primer that is specific to a vector sequence immediately before the PPAR $\gamma$ 2 open reading frame and a reverse primer that is specific to a PPAR $\gamma$ 2 open reading frame sequence at the 5' end. Data from three independent experiments are represented as mean  $\pm$  SEM (\*\*\*) $P < 0.001$ ,  $t$ -Test).

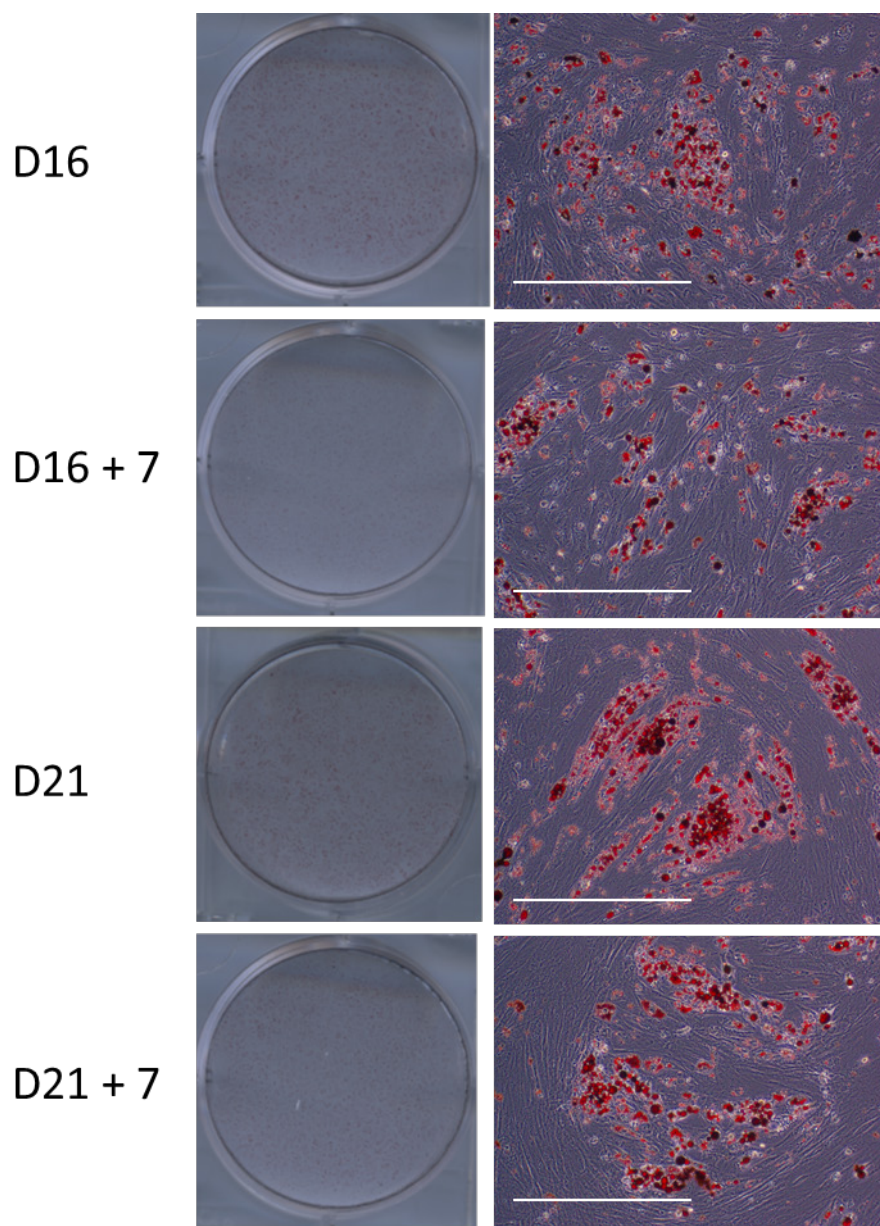

**Supplementary Figure S8. Delipidation of mature differentiated adipocyte-like cells via pluripotent stem cell stage using protocol described in supplementary Figure S6 did not occur 7 days after withdraw of PPAR $\gamma$ 2 overexpression inducing reagent DOX. (scale bar: 200  $\mu$ m)**

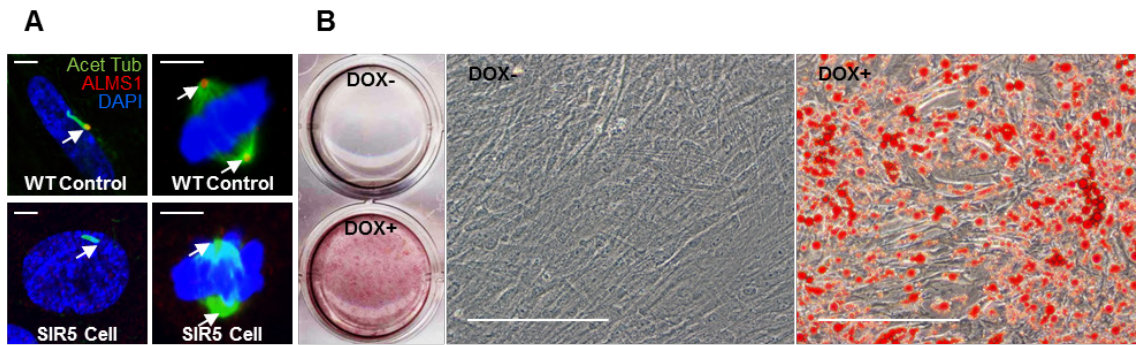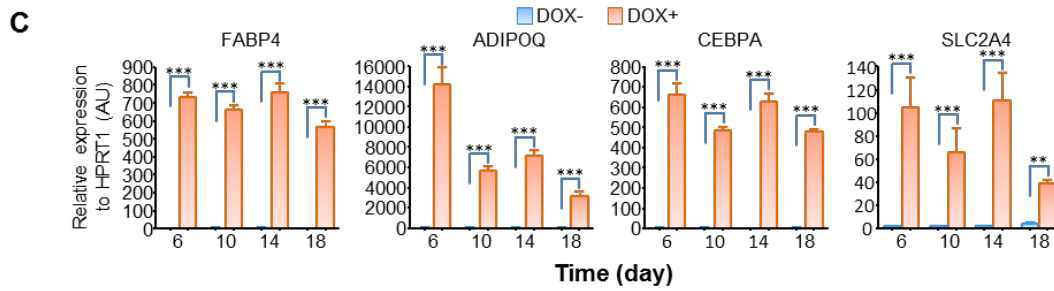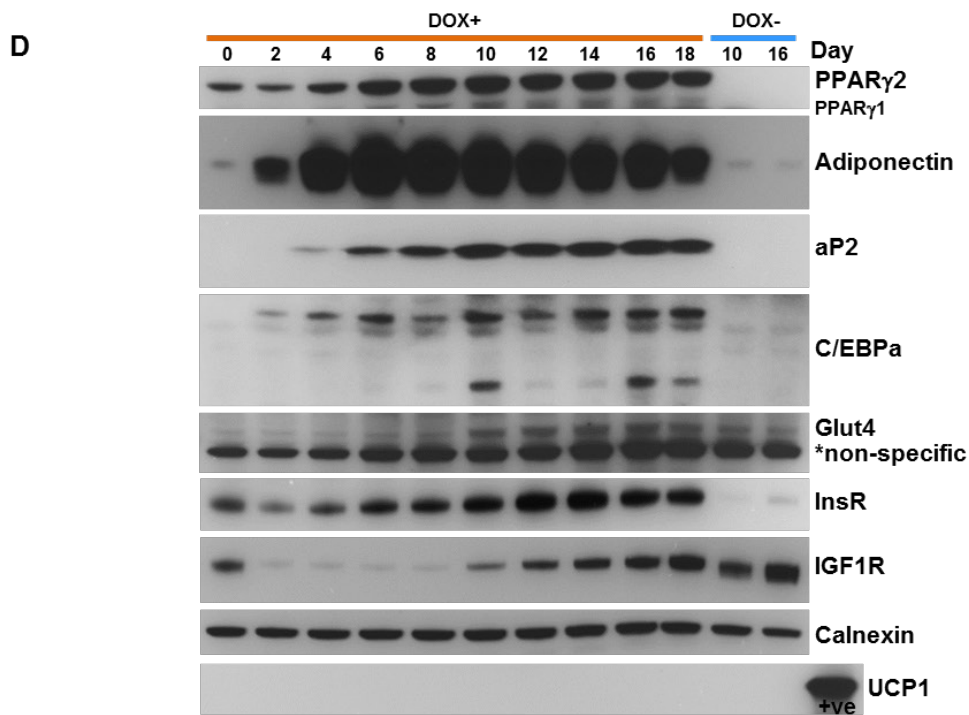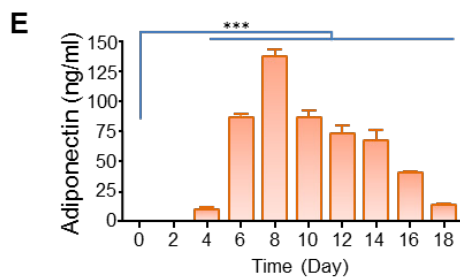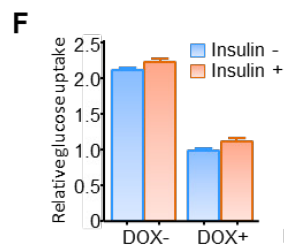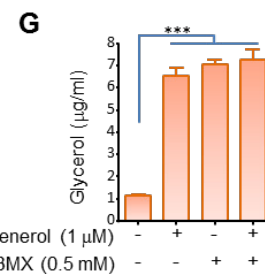

**Supplementary Figure S9. Direct reprogramming of dermal fibroblasts derived from an Alström Syndrome patient.** (A) Confocal immunofluorescence analysis revealed absence of ALMS1 at centrosome and the basal body of primary cilium in the patient cells due to the disease causing mutations on the *ALMS1* gene. (scale bar: 5  $\mu\text{m}$ ) (B) Oil Red O staining showing a successful conversion of ALMS1 dermal fibroblasts into adipocyte-like cells. (scale bar: 200  $\mu\text{m}$ ) (C) Quantitative RT-PCR analysis of expression of marker genes of white adipocytes at four different differentiation time points. (D) Western blot analysis of key proteins in adipocyte-like cells during direct reprogramming up to day 18, using antibodies as indicated. (E) Adiponectin secretion from direct reprogrammed adipocyte-like cells. 48 hour culture media were determined with DELFIA. (F) Glucose uptake assay. (G) Lipolysis assay of direct reprogrammed adipocyte-like cells treated with isoproterenol and/or IBMX. Data from three independent experiments are represented as mean  $\pm$  SEM (\*\* $P < 0.01$ , \*\*\* $P < 0.001$ , *t*-Test).

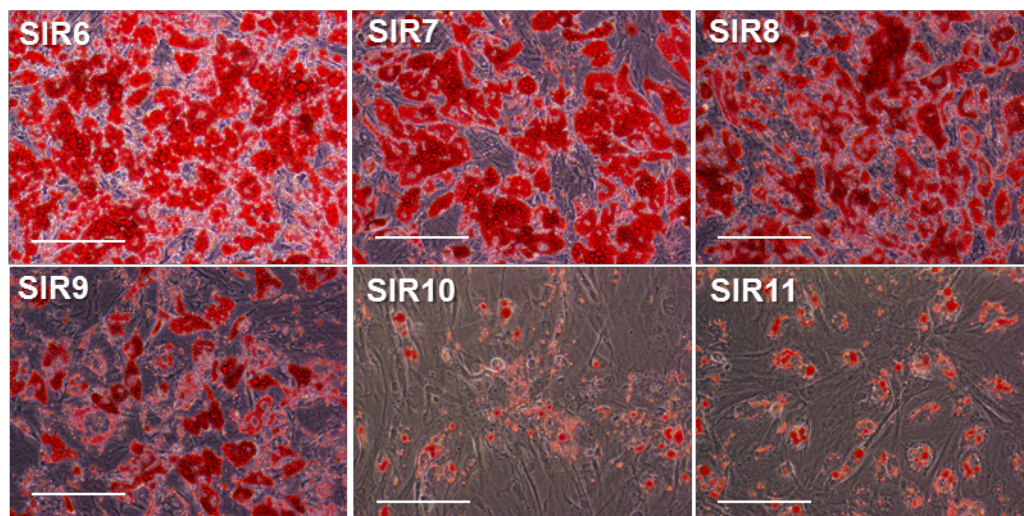

**Supplementary Figure S10. Direct reprogramming of dermal fibroblasts derived from lipodystrophy patients harbouring mutations on *WRN*, *BLM*, *NSMCE2*, *PIK3R1* and *PCYT1A* genes. (scale bar: 200  $\mu$ m)**

## Supplementary References

- Chen, J. H., T. Geberhiwot, et al. (2017). "Refining genotype-phenotype correlation in Alstrom syndrome through study of primary human fibroblasts." Mol Genet Genomic Med **5**(4): 390-404.
- Huang-Doran, I., P. Tomlinson, et al. (2016). "Insulin resistance uncoupled from dyslipidemia due to C-terminal PIK3R1 mutations." JCI Insight **1**(17): e88766.
- Kumar, S., P. N. Durrington, et al. (1996). "Severe insulin resistance, diabetes mellitus, hypertriglyceridemia, and pseudoacromegaly." J Clin Endocrinol Metab **81**(10): 3465-3468.
- Payne, F., R. Colnaghi, et al. (2014). "Hypomorphism in human NSMCE2 linked to primordial dwarfism and insulin resistance." J Clin Invest **124**(9): 4028-4038.
- Payne, F., K. Lim, et al. (2014). "Mutations disrupting the Kennedy phosphatidylcholine pathway in humans with congenital lipodystrophy and fatty liver disease." Proc Natl Acad Sci U S A **111**(24): 8901-8906.
- Simpkin, A., E. Cochran, et al. (2014). "Insulin Receptor and the Kidney: Nephrocalcinosis in Patients with Recessive INSR Mutations." Nephron Physiol **128**: 55-61.
